# Supplementary material
Source: publisher figshare collection journal article supplement (https://wiley.figshare.com/articles/dataset/_/3551220)
Supplement: Supplementary file 1 [file 1 › appendix-E.htm]

Ecological Archives E092-088-A5


### *Ecological Archives* E092-088-A5

### **Kyle F. Edwards and John J. Stachowicz. 2011. Spatially stochastic settlement and the coexistence of benthic marine animals. *Ecology* 92:1094–1103.**

Appendix E. The effect of settlement variation on the strength of competition.

> View / download PDF.

---


[Back to E092-088]
